# Supplementary material for: Single-cell transcriptome sequencing revealing the difference in photosynthesis and carbohydrate metabolism between epidermal cells and non-epidermal cells of Gracilariopsis lemaneiformis (Rhodophyta)
Source: Front Plant Sci. 2022 Nov 17;13:968158. doi: 10.3389/fpls.2022.968158 (PMC9714639; doi:10.3389/fpls.2022.968158)
Supplement: Supplementary file 1 [file Table_1.xlsx]

## Sheet: Table S1
Table S1. Sugars information of standard sample.
Name	Abbreviation	CAS number	Chemical formula
Glucose	Glc	50-99-7	C6H12O6
Fructose	Fru	57-48-7	C6H12O6
Trehalose	Tre	99-20-7	C12H22O11
Maltose	Mal	69-79-4	C12H22O11
Sucrose	Suc	57-50-1	C12 H22O11
Fucose	Fuc	2438-80-4	C6H12O5
Rhamnose	Rha	6155-35-7	C6H14O6
Arabinose	Ara	5328-37-0	C5H10O5
Galactose	Gal	26566-61-0	C6H12O6
Ribose	Rib	50-69-1	C5H10O5
Lactose	Lac	63-42-3	C12H22O11
Stachyose	Sta	54261-98-2	C24H44O22
Raffinose	Raf	512-69-6	C18H32O16

## Sheet: Table S2
Table S2.Sequences of the primers used in this study.
Gene name	Sequence
LXC000983-UBC-F	ACCATCTTCGGACCCCCA
LXC000983-UBC-R	CATCTCAGCGGTGAAGCGT
LXC007471-F	AAACCAAGCGACCCGACTAC
LXC007471-R	TGGGGTTGCGATGTAGGTG
LXC003907-F	ATGGTTTCTTGTTACGAGCCG
LXC003907-R	ATAAAAGCGGGTATCAATGCC
LXC003815-F	CGATGACGGATGAGCAGGT
LXC003815-R	TTCAGTCGGCACTTCAGGG
LXC005894-F	AATGCCAGTGCGGAGAGGT
LXC005894-R	TCGGGATGCTGACTTGGTTA
LXC006563-F	TCATCGGTGACACTGGCGTAG
LXC006563-R	GAATACAGGTGGGAAGGGGTT
LXC007122-F	TGTCTATCGTCTGGCAAAGGC
LXC007122-R	TCAAACATCGTGAACTACCGTG
LXC007366-F	TTGTTGAAACGGAAGGACGAT
LXC007366-R	GAAACGGCTTGCCATCTTG
LXC003873-F	CATACGGCACTTTCGCAGG
LXC003873-R	GCCTGGGCGTTAGAAATCG
LXC007417-F	CTCCCAAGGGCAAGTCTGAAA
LXC007417-R	CCACGATGCCAGGAATGTTAGT
LXC000078-F	AACTCTATCAAGACCGCCGAC
LXC000078-R	AGAACCTCCAATCCAAACCGA
LXC002339-F	TTTGGAACTTGCTGCTCGGTA
LXC002339-R	CGGGTTGATACACTGCTCTGG
LXC007675-F	CCAAACTCTACCGCACCGA
LXC007675-R	TCAACGCCTCAATACGCAAC
LXC001208-F	CAATACGGAAGGAGCGACGA
LXC001208-R	ATCTGAGACCCTCCATCCCA
LXC003730-F	GGAGAGTCTGTTGGAGCCTGT
LXC003730-R	GCCGCCAAGGACAATGAGTAT
LXC003082-F	CCCCAACACTTCAACCACAC
LXC003082-R	AAGATGGCTGTCTGCGGTGA
LXC001169-F	TCTGTCAAACATCGCATCCC
LXC001169-R	CTTCTCTGCCGTCGTTTTCG
LXC002721-F	GTTCATCAAGCAGTCGGAGGA
LXC002721-R	CCACTGAGCCTATCACCAACA

## Sheet: Table S3
Table S3. Kyoto Encyclopedia of Genes and Genomes (KEGG) pathways of carbohydrate metabolism enriched by DEGs of EC vs NEC.
Pathway ID	Pathway			pvalue	qvalue	DEGs number	All number	Genes
ko00010	Glycolysis / Gluconeogenesis			0.806587	0.999999	14	35	LXC000005;LXC000069;LXC000166;LXC000318;LXC000633;LXC000722;LXC000761;LXC000971;LXC001505;LXC001650;LXC001689;LXC001709;LXC001864;LXC001868;LXC002342;LXC002787;LXC002795;LXC003043;LXC003380;LXC003479;LXC003640;LXC004092;LXC004496;LXC004657;LXC005341;LXC005644;LXC005656;LXC006164;LXC007440;LXC007475;LXC007562;LXC007701;LXC007835;LXC007989;LXC008291
ko00620	Pyruvate metabolism			0.153755	0.860464	19	34	LXC000069;LXC000426;LXC000814;LXC000971;LXC001473;LXC001505;LXC001650;LXC001709;LXC001762;LXC001774;LXC001868;LXC002380;LXC002629;LXC002986;LXC003043;LXC003107;LXC003380;LXC003396;LXC003790;LXC003820;LXC004370;LXC004559;LXC004700;LXC005160;LXC005206;LXC005486;LXC005496;LXC005644;LXC005656;LXC006108;LXC006164;LXC006352;LXC007185;LXC007835
ko00520	Amino sugar and nucleotide sugar metabolism			0.0840436	0.690358	19	32	LXC000005;LXC000166;LXC000176;LXC000177;LXC000311;LXC000706;LXC000722;LXC000830;LXC000895;LXC000938;LXC001134;LXC001951;LXC001976;LXC002261;LXC002379;LXC002678;LXC003062;LXC003263;LXC003805;LXC004049;LXC005079;LXC006002;LXC006131;LXC006203;LXC006393;LXC006753;LXC006936;LXC007370;LXC007415;LXC007416;LXC007519;LXC007635
ko00051	Fructose and mannose metabolism			0.829974	0.999999	10	26	LXC000176;LXC000177;LXC000311;LXC000318;LXC000633;LXC000727;LXC001689;LXC001921;LXC002261;LXC002342;LXC002379;LXC002787;LXC003062;LXC003640;LXC003805;LXC004092;LXC004496;LXC004657;LXC005079;LXC006002;LXC006936;LXC007475;LXC007562;LXC008269;LXC008280;LXC008291
ko00030	Pentose phosphate pathway			0.783758	0.999999	10	25	LXC000166;LXC000318;LXC000633;LXC000722;LXC001240;LXC001244;LXC001428;LXC001496;LXC001689;LXC001886;LXC002342;LXC003640;LXC003856;LXC004078;LXC004092;LXC004141;LXC004496;LXC004657;LXC005340;LXC005467;LXC005803;LXC006699;LXC007475;LXC007562;LXC008291
ko00020	Citrate cycle (TCA cycle)			0.203006	0.860464	13	23	LXC000697;LXC001650;LXC001868;LXC002380;LXC002986;LXC003043;LXC003166;LXC003380;LXC003587;LXC004314;LXC004358;LXC004370;LXC004700;LXC005063;LXC005538;LXC005615;LXC005640;LXC005644;LXC005656;LXC006164;LXC006818;LXC006823;LXC007306
ko00500	Starch and sucrose metabolism			0.203006	0.860464	13	23	LXC000005;LXC000166;LXC000176;LXC000311;LXC000722;LXC001259;LXC001260;LXC002648;LXC002732;LXC002840;LXC003184;LXC003422;LXC003551;LXC003732;LXC003926;LXC004895;LXC005576;LXC005646;LXC006519;LXC006661;LXC006860;LXC007248;LXC007519
ko00630	Glyoxylate and dicarboxylate metabolism			0.203006	0.860464	13	23	LXC000351;LXC000425;LXC001302;LXC001815;LXC002369;LXC002380;LXC002517;LXC002986;LXC003019;LXC003043;LXC003460;LXC004262;LXC004559;LXC004686;LXC004700;LXC005063;LXC005486;LXC005496;LXC006164;LXC006565;LXC007194;LXC007306;LXC007835
ko00562	Inositol phosphate metabolism			0.202757	0.860464	12	21	LXC000224;LXC000615;LXC000638;LXC001272;LXC002364;LXC002418;LXC002439;LXC002787;LXC002902;LXC003086;LXC004734;LXC004816;LXC004858;LXC005870;LXC006029;LXC006553;LXC006651;LXC006887;LXC007105;LXC008069;LXC008207
ko00640	Propanoate metabolism			0.965263	0.999999	5	18	LXC000360;LXC001473;LXC001505;LXC001755;LXC002735;LXC003043;LXC003107;LXC003565;LXC003820;LXC004213;LXC004358;LXC005434;LXC005486;LXC005496;LXC005640;LXC006164;LXC007094;LXC007835
ko00052	Galactose metabolism			0.715605	0.999999	5	12	LXC000005;LXC000166;LXC000722;LXC000761;LXC001707;LXC003757;LXC004049;LXC004092;LXC004496;LXC007519;LXC008280;LXC008291
ko00053	Ascorbate and aldarate metabolism			0.187125	0.860464	7	11	LXC000312;LXC000706;LXC001272;LXC001951;LXC003014;LXC005628;LXC006008;LXC006226;LXC006887;LXC007416;LXC007950
ko00650	Butanoate metabolism			0.516204	0.999999	5	10	LXC001563;LXC002188;LXC002517;LXC003565;LXC004311;LXC005486;LXC005496;LXC005854;LXC006365;LXC007094
ko00040	Pentose and glucuronate interconversions			0.268079	0.934215	4	6	LXC000727;LXC001240;LXC001951;LXC007416;LXC007519;LXC008280
ko00660	C5-Branched dibasic acid metabolism			0.25186	0.934215	3	4	LXC002676;LXC002946;LXC006069;LXC008153
